# Supplementary material for: Dynamic effects of the bridged structure on the quantum yield of the cis → trans photoisomerization of azobenzene
Source: Royal Society of Chemistry journal article supplement (doi:10.1039/d2cp02418g), 2022-01-01
Supplement: d2cp02418g5.pdf [file d2cp02418g5.pdf]

## Supplementary material

# Dynamic Effects of the Bridged Structure on the Quantum Yield of the *Cis*→*Trans* Photoisomerization of Azobenzene

Toshiaki Matsubara\*

*Department of Chemistry, Faculty of Science, Kanagawa University, 2946, Tsuchiya, Hiratsuka, Kanagawa 259-1293, Japan*

1. Relative energies at the various levels
2. Optimized structural parameters of the  $S_1/S_0$ -CI at the various levels
3. Vertical excitation energies of  $S_0 \rightarrow S_1$  at the various levels
4. Pattern of motion of all normal modes for azobenzene **1**
5. Pattern of motion of all normal modes for diindane diazocine **4**
6. Orbitals constituting the active space for azobenzene **1**
7. Orbitals constituting the active space for diindane diazocine **4**
8. Optimized structure and the relative energy of the transition state TS'-CW for diindane diazocine **4**
9. Changes in the kinetic energy of the N atoms
10. Time evolution of the populations after the  $S_1$  excitation
11. Activity of all normal modes in the reactions of *cis*→*cis* for azobenzene **1** and diindane diazocine **4**
12. Cartesian coordinates of the optimized structures

**Table S1** Relative energies (kcal/mol) at the various levels of the *cis* and *trans* forms and the clockwise (CW) and counterclockwise (CCW) conical intersection (CI) in the *cis*→*trans* isomerization for azobenzene **1** and diindane diazocine **4**<sup>a</sup>

|                   | Azobenzene <b>1</b> <sup>b</sup> |         |         | Diindane diazocine <b>4</b> |         |         |
|-------------------|----------------------------------|---------|---------|-----------------------------|---------|---------|
|                   | Level 1                          | Level 2 | Level 3 | Level 1                     | Level 2 | Level 4 |
| <i>Cis</i>        | 0.0                              | 0.0     | 0.0     | 0.0                         | 0.0     | 0.0     |
| <i>Trans</i> -CCW | -8.9                             | -18.7   | -18.6   | 6.3                         | 2.1     | 3.5     |
| <i>Trans</i> -CW  | -8.9                             | -18.7   | -18.6   | 4.1                         | 5.9     |         |
| CI-CCW            | 42.1                             | 41.5    | 38.9    | 35.7                        | 36.6    |         |
| CI-CW             | 44.3                             | 41.5    | 39.1    | 39.6                        | 42.7    |         |

<sup>a</sup>Level 1, CASSCF(6,5) with the basis set 6-31G for all the atoms; Level 2, CASSCF(10,8) with the basis set 6-31G(d) for the N atoms and 6-31G for the C and H atoms; Level 3, CASSCF(10,8) with the basis set cc-pVDZ for all the atoms; Level 4, PBE(D3(BJ)) with the basis set def2TZVP for all the atoms [Ref. 12]. <sup>b</sup>For azobenzene **1**, *Trans*-CCW and *Trans*-CW are the same structures.

**Table S2** Optimized structural parameters (Å and degree) at the various levels of the  $S_1/S_0$ -CI in the *cis*→*trans* isomerization for azobenzene **1** and diindane diazocine **4**<sup>a</sup>

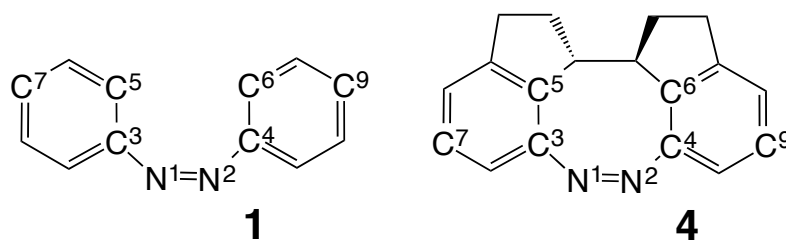

|                                                                | Azobenzene <b>1</b> |         |         | Diindane diazocine <b>4</b> |         |
|----------------------------------------------------------------|---------------------|---------|---------|-----------------------------|---------|
|                                                                | Level 1             | Level 2 | Level 3 | Level 1                     | Level 2 |
| Counterclockwise $S_1/S_0$ -CI                                 |                     |         |         |                             |         |
| d(N <sup>1</sup> -N <sup>2</sup> )                             | 1.311               | 1.285   | 1.287   | 1.347                       | 1.300   |
| d(N <sup>1</sup> -C <sup>3</sup> )                             | 1.427               | 1.403   | 1.398   | 1.406                       | 1.428   |
| d(N <sup>2</sup> -C <sup>4</sup> )                             | 1.373               | 1.376   | 1.375   | 1.440                       | 1.388   |
| C <sup>3</sup> -N <sup>1</sup> -N <sup>2</sup>                 | 117.4               | 117.0   | 117.4   | 117.4                       | 116.9   |
| C <sup>4</sup> -N <sup>2</sup> -N <sup>1</sup>                 | 131.5               | 131.2   | 130.7   | 124.6                       | 130.6   |
| C <sup>3</sup> -N <sup>1</sup> -N <sup>2</sup> -C <sup>4</sup> | 90.8                | 91.6    | 91.6    | 94.8                        | 95.4    |
| C <sup>5</sup> -C <sup>3</sup> -N <sup>1</sup> -N <sup>2</sup> | -177.4              | 179.5   | 179.6   | -70.2                       | -58.3   |
| C <sup>6</sup> -C <sup>4</sup> -N <sup>2</sup> -N <sup>1</sup> | -0.2                | -0.4    | -0.4    | -17.2                       | -25.2   |
| Clockwise $S_1/S_0$ -CI                                        |                     |         |         |                             |         |
| d(N <sup>1</sup> -N <sup>2</sup> )                             | 1.319               | 1.276   | 1.277   | 1.351                       | 1.281   |
| d(N <sup>1</sup> -C <sup>3</sup> )                             | 1.394               | 1.380   | 1.379   | 1.421                       | 1.385   |
| d(N <sup>2</sup> -C <sup>4</sup> )                             | 1.423               | 1.419   | 1.416   | 1.436                       | 1.429   |
| C <sup>3</sup> -N <sup>1</sup> -N <sup>2</sup>                 | 128.6               | 131.2   | 130.5   | 127.4                       | 134.3   |
| C <sup>4</sup> -N <sup>2</sup> -N <sup>1</sup>                 | 117.5               | 117.7   | 118.1   | 114.8                       | 114.9   |
| C <sup>3</sup> -N <sup>1</sup> -N <sup>2</sup> -C <sup>4</sup> | -91.0               | -92.4   | -92.4   | -93.2                       | -95.1   |
| C <sup>5</sup> -C <sup>3</sup> -N <sup>1</sup> -N <sup>2</sup> | -0.6                | 1.1     | 0.9     | 43.9                        | 42.9    |
| C <sup>6</sup> -C <sup>4</sup> -N <sup>2</sup> -N <sup>1</sup> | 178.7               | 179.7   | 179.3   | 85.5                        | 82.2    |

<sup>a</sup>Level 1, CASSCF(6,5) with the basis set 6-31G for all the atoms; Level 2, CASSCF(10,8) with the basis set 6-31G(d) for the N atoms and 6-31G for the C and H atoms; Level 3, CASSCF(10,8) with the basis set cc-pVDZ for all the atoms.

**Table S3** Vertical excitation energies of  $S_0 \rightarrow S_1$  at the various levels for azobenzene **1** and diindane diazocine **4**<sup>a</sup>

|                   | Azobenzene <b>1</b> | Diindane diazocine <b>4</b> |
|-------------------|---------------------|-----------------------------|
| Exp.              | 67.3 <sup>b</sup>   | 66.3 <sup>c</sup>           |
| CASSCF            |                     |                             |
| (6e,5o)/6-31G     | 74.7                | 72.0                        |
| (6e,5o)/6-31G(d)  | 77.4                | 89.7                        |
| (6e,5o)/cc-pVDZ   | 77.2                | 89.7                        |
| (10e,8o)/6-31G    | 69.5                | 66.6                        |
| (10e,8o)/6-31G(d) | 75.3                | 73.1                        |
| (10e,8o)/cc-pVDZ  | 75.1                | 72.6                        |
| MS-CASPT2         |                     |                             |
| (6e,5o)/6-31G     | 80.3                | 77.8                        |
| (6e,5o)/6-31G(d)  | 62.2                | 77.5                        |
| (6e,5o)/cc-pVDZ   | 61.4                | 75.5                        |
| (10e,8o)/6-31G    | 66.5                | 64.5                        |
| (10e,8o)/6-31G(d) | 67.8                | 65.1                        |
| (10e,8o)/cc-pVDZ  | 67.0                | 63.6                        |
| XMS-CASPT2        |                     |                             |
| (6e,5o)/cc-pVDZ   | 56.8                | 66.1                        |
| (10e,8o)/cc-pVDZ  | 64.3                |                             |

<sup>a</sup>The structures optimized at the CASSCF(6,5)/6-31G level were used. <sup>b</sup>D. L. Beveridge and H. H. Jaffé, *J. Am. Chem. Soc.*, 1966, **88**, 1948–1953. <sup>c</sup>Ref. 12

**Table S4** Pattern of motion of all normal modes for azobenzene **1** with the *cis* form and the vibrational frequencies for each normal mode at the CASSCF(10,8)/cc-pVDZ level

| Normal mode No. | Vibrational frequency (cm <sup>-1</sup> ) | Pattern of motion                     |
|-----------------|-------------------------------------------|---------------------------------------|
| 1               | 31.4                                      | Rotation of Ph                        |
| 2               | 59.5                                      | Rotation of Ph                        |
| 3               | 63.8                                      | Butterfly motion of Ph                |
| 4               | 155.0                                     | Twist of N <sub>2</sub>               |
| 5               | 158.4                                     | Butterfly motion of Ph                |
| 6               | 280.1                                     | Butterfly motion of Ph                |
| 7               | 335.1                                     | Wag of N <sub>2</sub>                 |
| 8               | 445.5                                     | Twist of Ph                           |
| 9               | 448.1                                     | Twist of Ph                           |
| 10              | 456.5                                     | Twist of Ph                           |
| 11              | 484.0                                     | Bend of Ph                            |
| 12              | 538.1                                     | Bend of Ph                            |
| 13              | 592.2                                     | Bend of Ph                            |
| 14              | 632.2                                     | Bend of Ph                            |
| 15              | 671.6                                     | Deformation of Ph                     |
| 16              | 675.8                                     | Deformation of Ph                     |
| 17              | 740.5                                     | Bend of Ph                            |
| 18              | 767.1                                     | Bend of Ph                            |
| 19              | 771.9                                     | Bend of Ph                            |
| 20              | 795.3                                     | Bend of H                             |
| 21              | 833.8                                     | Bend of H                             |
| 22              | 860.2                                     | Bend of H                             |
| 23              | 940.7                                     | Bend of H                             |
| 24              | 943.4                                     | Bend of H                             |
| 25              | 952.2                                     | Bend of H, Rotation of N <sub>2</sub> |
| 26              | 1022.2                                    | Bend of H                             |
| 27              | 1039.0                                    | Bend of H, Rotation of N <sub>2</sub> |
| 28              | 1083.2                                    | Deformation of Ph                     |
| 29              | 1083.9                                    | Deformation of Ph                     |

|    |        |                                         |
|----|--------|-----------------------------------------|
| 30 | 1088.4 | Bend of H                               |
| 31 | 1089.6 | Bend of H                               |
| 32 | 1106.3 | Bend of H                               |
| 33 | 1107.2 | Bend of H                               |
| 34 | 1115.9 | Deformation of Ph                       |
| 35 | 1118.6 | Deformation of Ph                       |
| 36 | 1166.0 | Deformation of Ph                       |
| 37 | 1168.0 | Deformation of Ph                       |
| 38 | 1206.5 | Deformation of Ph                       |
| 39 | 1211.9 | Deformation of Ph                       |
| 40 | 1224.0 | Deformation of Ph                       |
| 41 | 1271.7 | Rocking of H                            |
| 42 | 1274.0 | Rocking of H                            |
| 43 | 1296.3 | Deformation of Ph                       |
| 44 | 1322.4 | Rocking of H                            |
| 45 | 1327.0 | Rocking of H                            |
| 46 | 1435.8 | Rocking of H                            |
| 47 | 1440.9 | Rocking of H                            |
| 48 | 1585.8 | Rocking of H, Stretch of N <sub>2</sub> |
| 49 | 1589.2 | Rocking of H, Stretch of N <sub>2</sub> |
| 50 | 1600.5 | Rocking of H, Stretch of N <sub>2</sub> |
| 51 | 1636.5 | Rocking of H                            |
| 52 | 1651.2 | Rocking of H                            |
| 53 | 1776.1 | Stretch of Ph CC                        |
| 54 | 1783.8 | Stretch of Ph CC                        |
| 55 | 1794.3 | Stretch of Ph CC                        |
| 56 | 1801.0 | Stretch of Ph CC                        |
| 57 | 3337.6 | Stretch of Ph CH                        |
| 58 | 3338.4 | Stretch of Ph CH                        |
| 59 | 3348.3 | Stretch of Ph CH                        |
| 60 | 3349.4 | Stretch of Ph CH                        |
| 61 | 3358.7 | Stretch of Ph CH                        |
| 62 | 3359.8 | Stretch of Ph CH                        |

|    |        |                  |
|----|--------|------------------|
| 63 | 3368.4 | Stretch of Ph CH |
| 64 | 3369.4 | Stretch of Ph CH |
| 65 | 3375.8 | Stretch of Ph CH |
| 66 | 3377.0 | Stretch of Ph CH |

**Table S5** Pattern of motion of all normal modes for diindane diazocine **4** with the *cis* form and the vibrational frequencies for each normal mode at the CASSCF(6,5)/6-31G level

| Normal mode No. | Vibrational frequency (cm <sup>-1</sup> ) | Pattern of motion                                                                |
|-----------------|-------------------------------------------|----------------------------------------------------------------------------------|
| 1               | 54.3                                      | Butterfly motion of 6-membered ring                                              |
| 2               | 81.5                                      | Rotation of 6-membered ring                                                      |
| 3               | 140.2                                     | Twist of 5-membered ring                                                         |
| 4               | 166.7                                     | Twist of 5-membered ring                                                         |
| 5               | 190.1                                     | Twist of N <sub>2</sub>                                                          |
| 6               | 212.8                                     | Butterfly motion of 6-membered ring                                              |
| 7               | 254.5                                     | Bend of 5-membered ring                                                          |
| 8               | 256.4                                     | Bend of 5-membered ring                                                          |
| 9               | 280.7                                     | Deformation of 8-membered ring                                                   |
| 10              | 310.5                                     | Bend of 5-membered ring                                                          |
| 11              | 355.7                                     | Butterfly motion of 6-membered ring                                              |
| 12              | 426.1                                     | Bend of 8-membered ring                                                          |
| 13              | 436.0                                     | Bend of 6-membered ring                                                          |
| 14              | 451.3                                     | Bend of 6-membered ring                                                          |
| 15              | 502.7                                     | Deformation of 6-membered ring                                                   |
| 16              | 544.5                                     | Bend of 6-membered ring                                                          |
| 17              | 551.3                                     | Bend of 6-membered ring                                                          |
| 18              | 567.3                                     | Bend of 6-membered ring                                                          |
| 19              | 599.9                                     | Bend of 5 and 6-membered rings                                                   |
| 20              | 612.2                                     | Bend of 6-membered ring                                                          |
| 21              | 616.3                                     | Bend of 6-membered ring                                                          |
| 22              | 652.7                                     | Bend of 6-membered ring                                                          |
| 23              | 663.8                                     | Bend of 6-membered ring, Deformation of 5-membered ring, Twist of N <sub>2</sub> |
| 24              | 672.1                                     | Deformation of 5 and 6-membered rings                                            |
| 25              | 693.3                                     | Deformation of 5 and 6-membered rings                                            |
| 26              | 731.2                                     | Deformation of 5 and 6-membered rings                                            |
| 27              | 775.5                                     | Deformation of 5 and 6-membered rings                                            |
| 28              | 808.7                                     | Deformation of 5 and 6-membered rings                                            |



|    |        |                                                                        |
|----|--------|------------------------------------------------------------------------|
| 29 | 853.3  | Deformation of 5 and 6-membered rings,<br>Rocking of 6-membered ring H |
| 30 | 865.2  | Deformation of 5 and 6-membered rings,<br>Rocking of 6-membered ring H |
| 31 | 898.8  | Deformation of 5 and 6-membered rings,<br>Rocking of 6-membered ring H |
| 32 | 908.3  | Deformation of 5 and 6-membered rings,<br>Rocking of 6-membered ring H |
| 33 | 924.1  | Bend of 6-membered ring H                                              |
| 34 | 933.5  | Deformation of 5 and 6-membered rings                                  |
| 35 | 951.6  | Deformation of 5 and 6-membered rings                                  |
| 36 | 985.3  | Deformation of 5 and 6-membered rings                                  |
| 37 | 986.9  | Stretch of CC                                                          |
| 38 | 1012.8 | Stretch of CC                                                          |
| 39 | 1047.9 | Stretch of CC                                                          |
| 40 | 1051.5 | Stretch of CC                                                          |
| 41 | 1062.4 | Stretch of CC                                                          |
| 42 | 1069.9 | Bend of 6-membered ring H                                              |
| 43 | 1077.4 | Bend of 6-membered ring H                                              |
| 44 | 1112.2 | Stretch of CC                                                          |
| 45 | 1142.8 | Stretch of CC                                                          |
| 46 | 1157.4 | Bend of 6-membered ring H                                              |
| 47 | 1162.3 | Bend of 6-membered ring H                                              |
| 48 | 1172.7 | Stretch of CC                                                          |
| 49 | 1186.0 | Stretch of CC                                                          |
| 50 | 1189.6 | Stretch of CC                                                          |
| 51 | 1221.3 | Stretch of CC                                                          |
| 52 | 1270.9 | Deformation of 5 and 6-membered rings                                  |
| 53 | 1284.0 | Deformation of 5 and 6-membered rings                                  |
| 54 | 1289.9 | Stretch of CC                                                          |
| 55 | 1291.4 | Bend of 6-membered ring H                                              |
| 56 | 1295.7 | Stretch of CC                                                          |
| 57 | 1299.9 | Deformation of 5 and 6-membered rings                                  |

|    |        |                                       |
|----|--------|---------------------------------------|
| 58 | 1305.2 | Stretch of CC                         |
| 59 | 1318.7 | Stretch of CC                         |
| 60 | 1338.8 | Deformation of 5 and 6-membered rings |
| 61 | 1347.9 | Deformation of 5 and 6-membered rings |
| 62 | 1381.7 | Stretch of CC                         |
| 63 | 1386.7 | Stretch of CC                         |
| 64 | 1395.3 | Stretch of CC                         |
| 65 | 1407.0 | Stretch of CC                         |
| 66 | 1421.1 | Bend of 5-membered ring H             |
| 67 | 1437.1 | Bend of 5-membered ring H             |
| 68 | 1458.6 | Bend of 5-membered ring H             |
| 69 | 1471.0 | Bend of 5-membered ring H             |
| 70 | 1480.7 | Bend of 5-membered ring H             |
| 71 | 1489.9 | Bend of 5-membered ring H             |
| 72 | 1501.9 | Bend of 5-membered ring H             |
| 73 | 1546.6 | Bend of 5-membered ring H             |
| 74 | 1603.2 | Stretch of CC                         |
| 75 | 1620.1 | Stretch of CC                         |
| 76 | 1635.1 | Rocking of 6-membered ring H          |
| 77 | 1644.5 | Rocking of 6-membered ring H          |
| 78 | 1646.4 | Bend of 5-membered ring H             |
| 79 | 1650.1 | Bend of 5-membered ring H             |
| 80 | 1657.0 | Bend of 5-membered ring H             |
| 81 | 1664.0 | Bend of 5-membered ring H             |
| 82 | 1704.7 | Stretch of N <sub>2</sub>             |
| 83 | 1776.8 | Stretch of CC                         |
| 84 | 1796.7 | Stretch of CC                         |
| 85 | 1806.5 | Stretch of CC                         |
| 86 | 1809.4 | Stretch of CC                         |
| 87 | 3138.3 | Stretch of CH                         |
| 88 | 3174.2 | Stretch of CH                         |
| 89 | 3182.8 | Stretch of CH                         |
| 90 | 3197.1 | Stretch of CH                         |

|     |        |               |
|-----|--------|---------------|
| 91  | 3207.5 | Stretch of CH |
| 92  | 3225.2 | Stretch of CH |
| 93  | 3243.0 | Stretch of CH |
| 94  | 3245.1 | Stretch of CH |
| 95  | 3264.9 | Stretch of CH |
| 96  | 3285.7 | Stretch of CH |
| 97  | 3355.8 | Stretch of CH |
| 98  | 3356.0 | Stretch of CH |
| 99  | 3374.8 | Stretch of CH |
| 100 | 3378.1 | Stretch of CH |
| 101 | 3394.0 | Stretch of CH |
| 102 | 3401.0 | Stretch of CH |

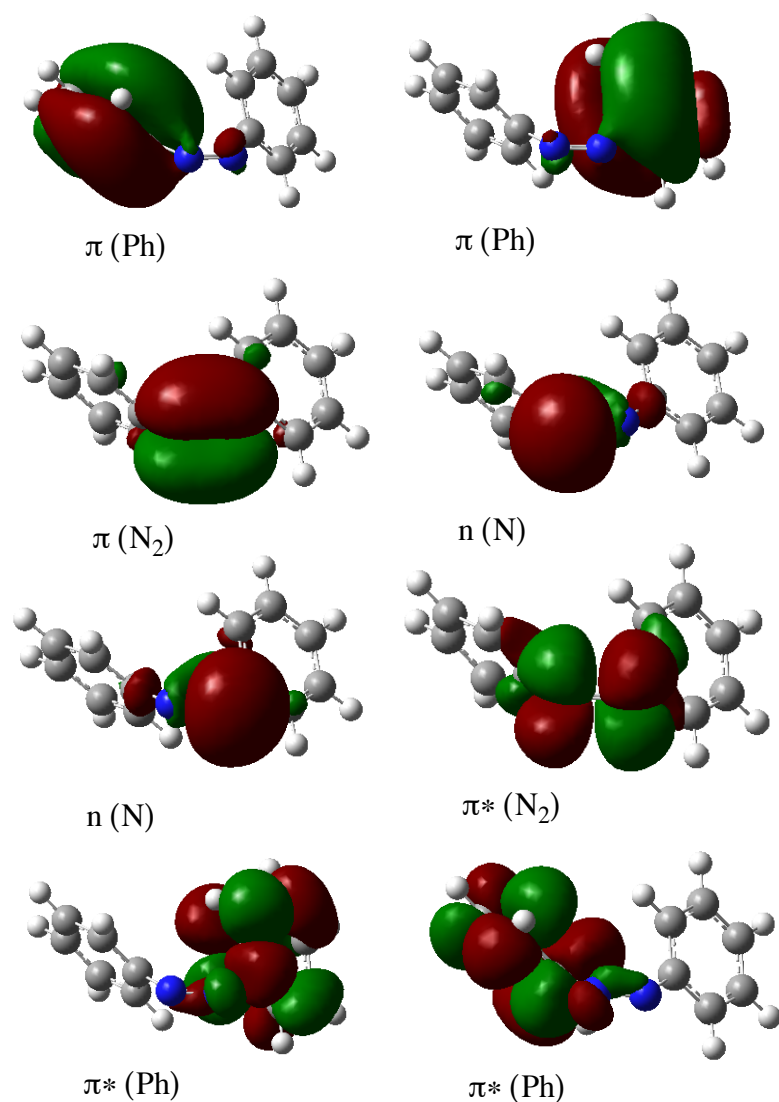

**Fig. S1** Orbitals constituting the active space for the CASSCF calculations given at the equilibrium geometry with the *cis* form for azobenzene **1**; two  $\pi$  orbitals of the Ph groups,  $\pi$  orbital of the N<sub>2</sub>, two nonbonding orbitals of the N atoms,  $\pi^*$  orbital of the N<sub>2</sub> and two  $\pi^*$  orbitals of the Ph groups for eight orbitals and the  $\pi$  orbital of the N<sub>2</sub>, two nonbonding orbitals of the N atoms,  $\pi^*$  orbital of the N<sub>2</sub> and one  $\pi^*$  orbital of the Ph group for five orbitals.

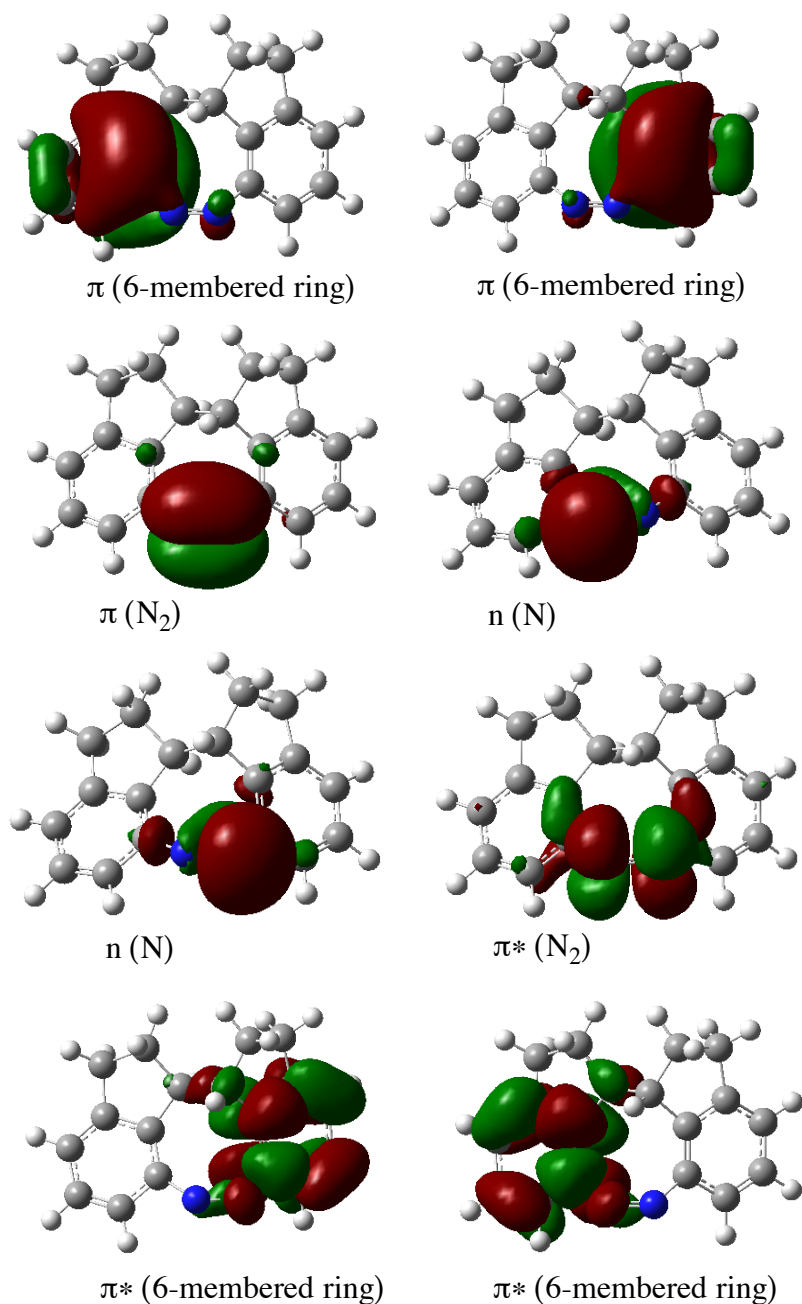

**Fig. S2** Orbitals constituting the active space for the CASSCF calculations given at the equilibrium geometry with the *cis* form for diindane diazocine **4**; two  $\pi$  orbitals of the six-membered rings,  $\pi$  orbital of the  $N_2$ , two nonbonding orbitals of the N atoms,  $\pi^*$  orbital of the  $N_2$  and two  $\pi^*$  orbitals of the six-membered rings for eight orbitals and the  $\pi$  orbital of the  $N_2$ , two nonbonding orbitals of the N atoms,  $\pi^*$  orbital of the  $N_2$  and one  $\pi^*$  orbital of the six-membered ring for five orbitals.

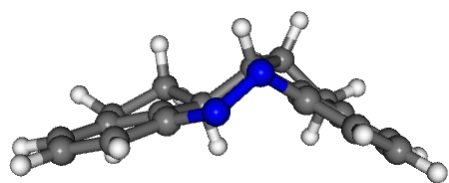

Sideview

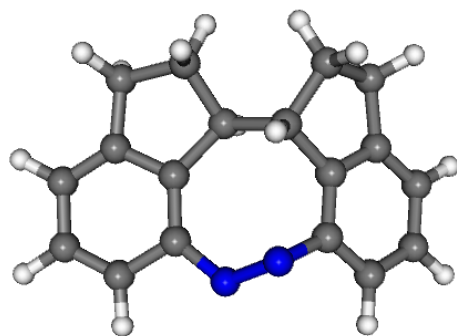

Topview

**4, TS'-CW**  $\nu^\ddagger=1265.9i$

38.9 CAS(6,5)PT2/cc-pVDZ

24.6 CASSCF(6,5)/6-31G

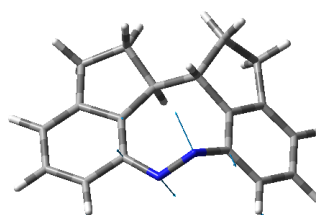

**Fig. S3** Optimized structure of the transition state TS'-CW by the clockwise rotation of the  $-N=N-$  moiety in the ground state ( $S_0$ ) at the CASSCF(6,5)/6-31G level for diindane diazocine **4**. The imaginary frequency ( $\text{cm}^{-1}$ ), its displacement vector and energies (kcal/mol) at the CASSCF(6,5)/6-31G and CAS(6,5)PT2/cc-pVDZ levels relative to those of the *cis* form were presented together.

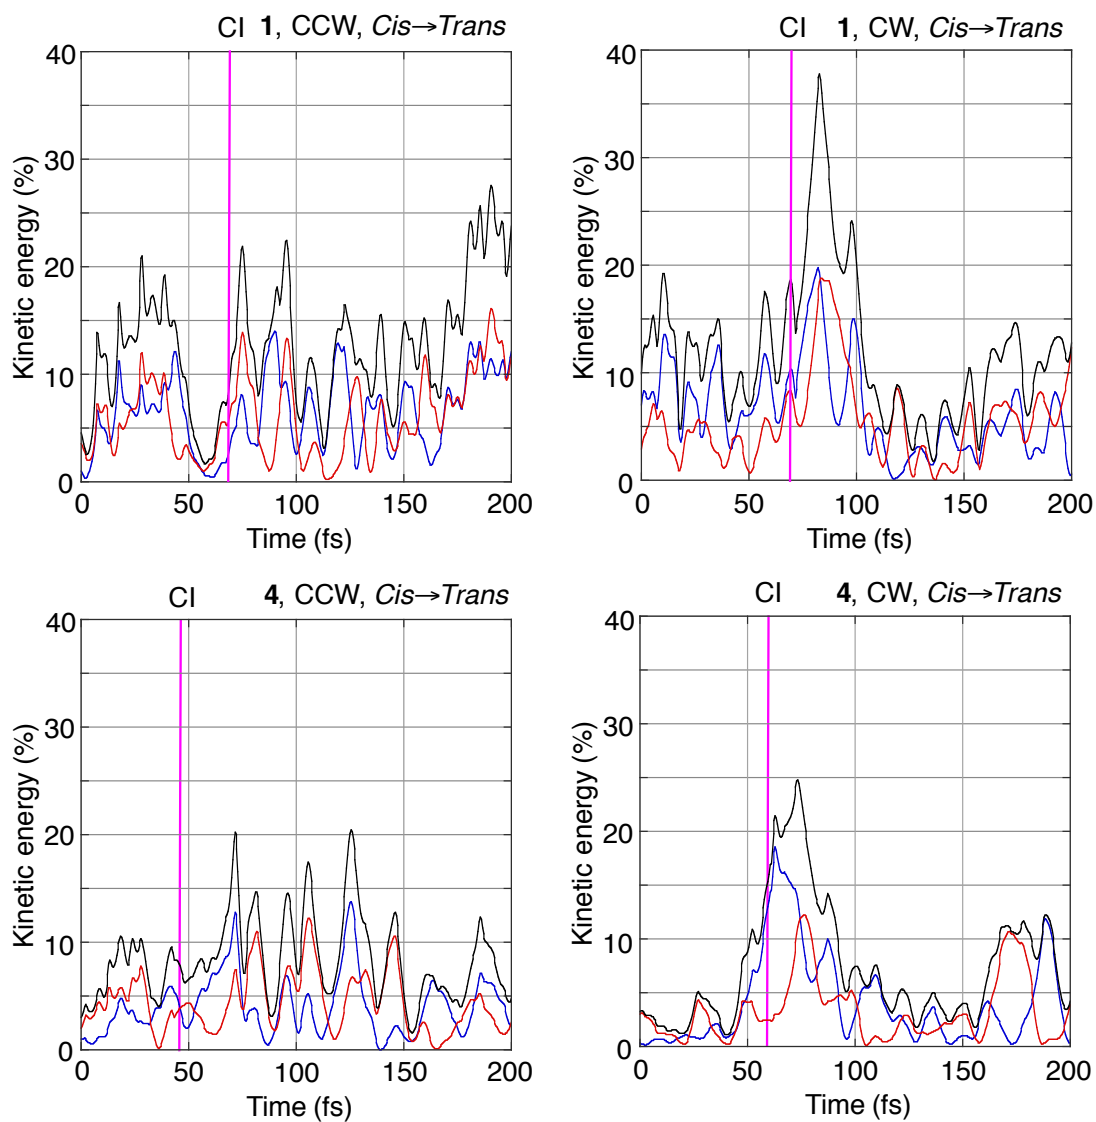

**Fig. S4** Changes in the ratio of the kinetic energy of the N atoms in the isomerization of *cis*→*trans* by the clockwise (CW) and counterclockwise (CCW) rotations for azobenzene **1** and diindane diazocine **4**. Legend: N<sup>1</sup> [red]; N<sup>2</sup> [blue]; N<sub>2</sub> [black].

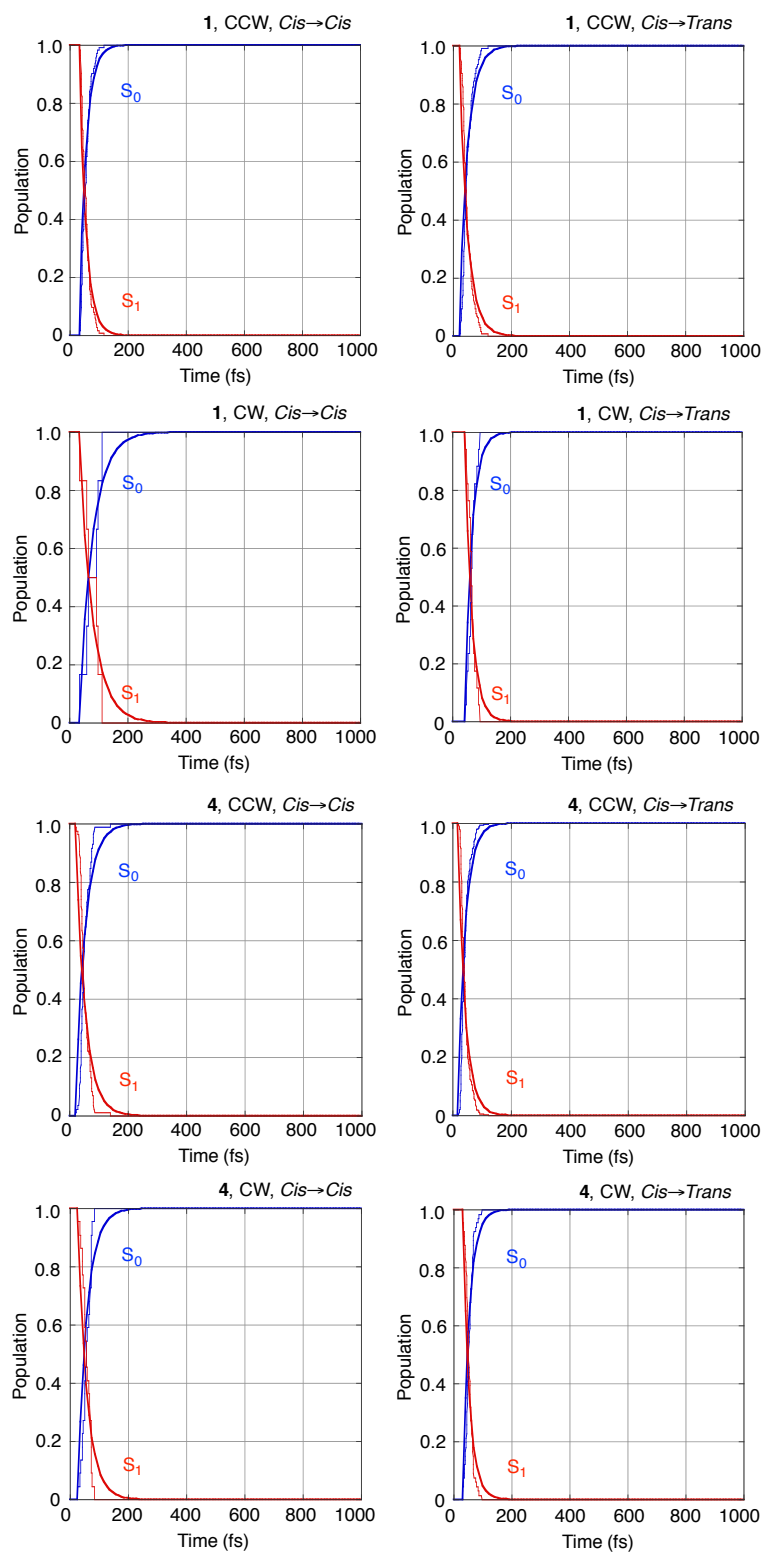

**Fig. S5** Relative populations obtained from an ensemble (thin lines) and global fits (thick lines) to the populations in the reactions of  $cis \rightarrow cis$  and  $cis \rightarrow trans$  by both clockwise (CW) and counterclockwise (CCW) rotations after the  $S_1$  excitation for azobenzene **1** and diindane diazocine **4**.



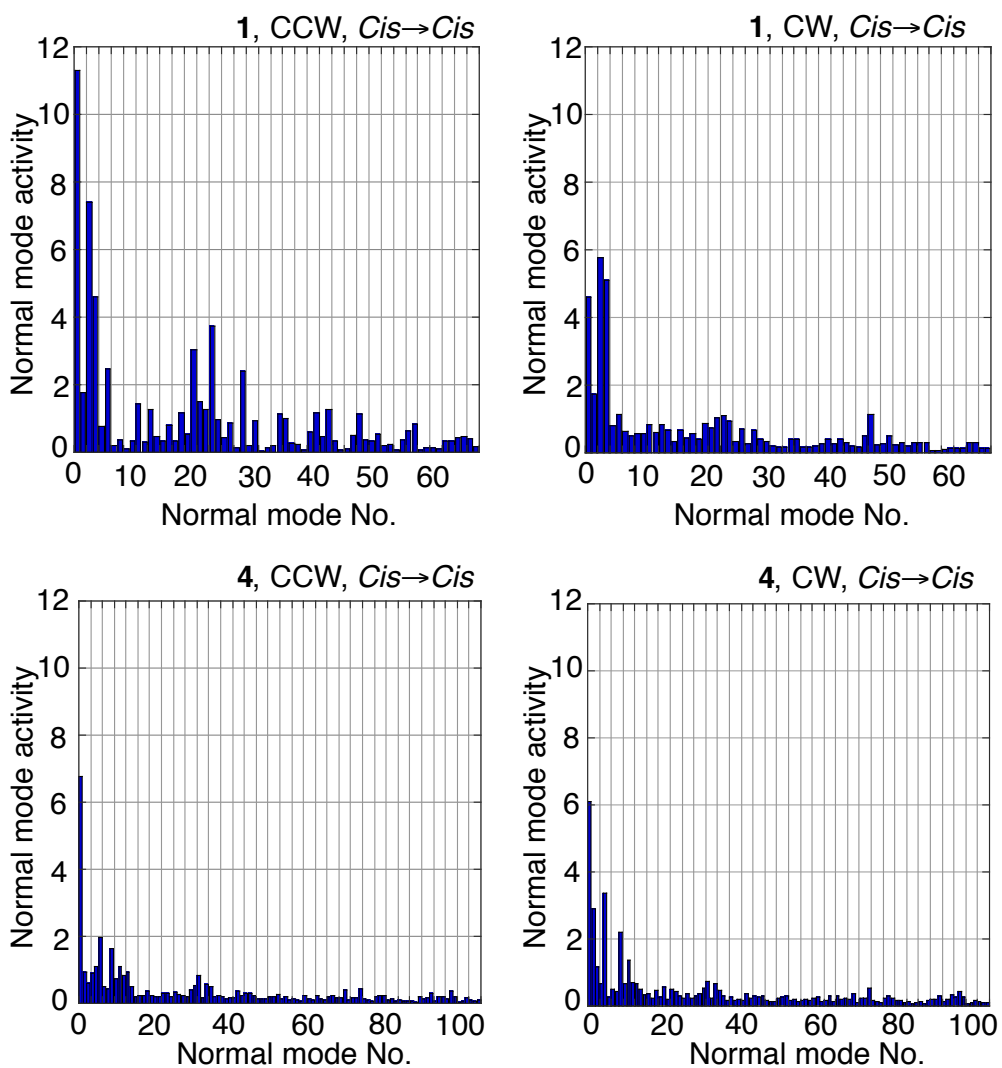

**Fig. S6** Activity of all normal modes obtained from an ensemble in the reactions of *cis*→*cis* by both clockwise (CW) and counterclockwise (CCW) rotations after the internal conversion to the  $S_0$  state (100–1000 fs) for azobenzene **1** and diindane diazocine **4**.

Cartesian coordinates (in Å)

1 (*cis*, level 1)

N 0.631811 -1.957893 0.017204  
 N -0.627430 -1.961308 -0.024043  
 C 1.441802 -0.767429 0.099838  
 C -1.442906 -0.771765 -0.094977  
 C -2.488472 -0.674242 0.801911  
 C -3.371452 0.415298 0.725553  
 C -3.217577 1.356839 -0.261196  
 C -2.175432 1.231499 -1.194579  
 C -1.293283 0.184911 -1.116735  
 H -2.621006 -1.438235 1.542725  
 H -4.173157 0.496426 1.433604  
 H -3.896651 2.184332 -0.331133  
 H -2.069914 1.960635 -1.974361  
 H -0.499886 0.088791 -1.830819  
 C 2.486274 -0.662617 -0.807385  
 C 3.359454 0.410710 -0.731696  
 C 3.212283 1.358494 0.272446  
 C 2.187984 1.228309 1.199079  
 C 1.297500 0.167899 1.114911  
 H 2.609806 -1.423941 -1.552449  
 H 4.158809 0.498054 -1.441645  
 H 3.895616 2.182659 0.338860  
 H 2.079861 1.949088 1.986114  
 H 0.508795 0.069171 1.833948

1 (*trans*, level 1)

N -0.388629 0.480109 0.000009  
 N 0.395269 -0.469761 -0.000047  
 C 1.786439 -0.177038 -0.000020  
 C -1.781876 0.181674 0.000004  
 C -2.636232 1.280063 0.000037  
 C -4.016094 1.087051 0.000035  
 C -4.536617 -0.191264 0.000003  
 C -3.680760 -1.298996 -0.000029  
 C -2.302176 -1.118836 -0.000030  
 H -2.211149 2.264065 0.000063  
 H -4.671826 1.936362 0.000060  
 H -5.599715 -0.338981 0.000003  
 H -4.089055 -2.291350 -0.000053  
 H -1.634622 -1.955575 -0.000054  
 C 2.632481 -1.275821 0.000033  
 C 4.007581 -1.092703 0.000061  
 C 4.532387 0.191110 0.000027  
 C 3.681125 1.291729 -0.000032  
 C 2.308837 1.113233 -0.000055  
 H 2.200746 -2.256973 0.000052  
 H 4.661283 -1.943231 0.000106  
 H 5.595650 0.336740 0.000045  
 H 4.089071 2.284143 -0.000062  
 H 1.642560 1.951153 -0.000101

1 (CI-CW, level 1)

N 0.506765 1.116972 0.770549  
 N -0.598311 1.505492 0.181067  
 C 1.627903 0.493124 0.280292  
 C -1.681541 0.577447 0.139287  
 C -2.810184 1.012571 -0.543745  
 C -3.909545 0.178896 -0.665770  
 C -3.885690 -1.085799 -0.093063  
 C -2.761763 -1.513640 0.602122  
 C -1.657501 -0.685300 0.721539  
 H -2.805928 1.997242 -0.966969  
 H -4.778793 0.513623 -1.197257  
 H -4.738116 -1.731163 -0.181741  
 H -2.747143 -2.487192 1.052086  
 H -0.794949 -1.008045 1.268779  
 C 2.684197 0.213216 1.182124  
 C 3.817606 -0.402871 0.733343  
 C 3.953794 -0.760089 -0.621887  
 C 2.936387 -0.485209 -1.502477  
 C 1.763326 0.141534 -1.066474  
 H 2.571363 0.497751 2.209188  
 H 4.615032 -0.613916 1.419493  
 H 4.850757 -1.240954 -0.959982  
 H 3.032001 -0.748529 -2.538290  
 H 0.974676 0.360651 -1.758364

1 (CI-CCW, level 1)

N -0.388629 0.480109 0.000009  
 N 0.395269 -0.469761 -0.000047  
 C 1.786439 -0.177038 -0.000020  
 C -1.781876 0.181674 0.000004  
 C -2.636232 1.280063 0.000037  
 C -4.016094 1.087051 0.000035  
 C -4.536617 -0.191264 0.000003  
 C -3.680760 -1.298996 -0.000029  
 C -2.302176 -1.118836 -0.000030  
 H -2.211149 2.264065 0.000063  
 H -4.671826 1.936362 0.000060  
 H -5.599715 -0.338981 0.000003  
 H -4.089055 -2.291350 -0.000053  
 H -1.634622 -1.955575 -0.000054  
 C 2.632481 -1.275821 0.000033  
 C 4.007581 -1.092703 0.000061  
 C 4.532387 0.191110 0.000027  
 C 3.681125 1.291729 -0.000032  
 C 2.308837 1.113233 -0.000055  
 H 2.200746 -2.256973 0.000052  
 H 4.661283 -1.943231 0.000106  
 H 5.595650 0.336740 0.000045  
 H 4.089071 2.284143 -0.000062  
 H 1.642560 1.951153 -0.000101

1 (*cis*, level 2)

N -0.619108 2.035075 0.042041  
 N 0.598873 2.037980 -0.006232  
 C -1.363185 0.804103 0.104468  
 C 1.347591 0.808198 -0.092451  
 C 2.296877 0.562494 0.897656  
 C 3.119397 -0.559834 0.806378  
 C 3.027194 -1.404413 -0.281112  
 C 2.109003 -1.135462 -1.298276  
 C 1.268688 -0.028870 -1.210549  
 H 2.387222 1.242597 1.722483  
 H 3.835131 -0.755412 1.581424  
 H 3.668341 -2.261614 -0.353314  
 H 2.049660 -1.780763 -2.153117  
 H 0.569035 0.183527 -1.993633  
 C -2.323375 0.591144 -0.856274  
 C -3.138423 -0.546242 -0.795529  
 C -3.013809 -1.431920 0.248362  
 C -2.068264 -1.191147 1.256001  
 C -1.245178 -0.080398 1.189810  
 H -2.443651 1.303627 -1.649410  
 H -3.869450 -0.712357 -1.562961  
 H -3.644274 -2.298188 0.302521  
 H -1.982320 -1.868899 2.083072  
 H -0.527145 0.110188 1.961379

1 (*trans*, level 2)

N 0.371160 -0.481280 0.000079  
 N -0.372044 0.484552 0.000117  
 C -1.761568 0.186576 0.000051  
 C 1.762273 -0.183162 0.000019  
 C 2.605905 -1.273521 0.000742  
 C 3.991305 -1.097305 0.000742  
 C 4.524192 0.187629 -0.000042  
 C 3.666368 1.297079 -0.000813  
 C 2.289246 1.119073 -0.000776  
 H 2.177388 -2.256442 0.001323  
 H 4.638571 -1.952639 0.001333  
 H 5.587626 0.331068 -0.000085  
 H 4.075229 2.289222 -0.001439  
 H 1.625031 1.957618 -0.001346  
 C -2.606579 1.270992 0.000778  
 C -3.996486 1.087357 0.000750  
 C -4.520201 -0.181667 -0.000044  
 C -3.661058 -1.296042 -0.000813  
 C -2.291092 -1.119919 -0.000760  
 H -2.184186 2.256447 0.001376  
 H -4.644111 1.942440 0.001341  
 H -5.583176 -0.328536 -0.000092  
 H -4.073545 -2.286490 -0.001446  
 H -1.626489 -1.958129 -0.001328

1 (CI-CW, level 2)

N 0.484624 -1.139007 -0.724487  
N -0.593621 -1.496790 -0.123620  
C 1.613206 -0.503408 -0.259457  
C -1.656136 -0.580236 -0.119856  
C -2.825796 -1.012842 0.539517  
C -3.912690 -0.183826 0.628930  
C -3.870768 1.096606 0.053400  
C -2.738627 1.522570 -0.604193  
C -1.620737 0.689772 -0.700015  
H -2.835726 -1.997233 0.964139  
H -4.800180 -0.511629 1.134262  
H -4.727051 1.739128 0.123256  
H -2.709710 2.497768 -1.050287  
H -0.746471 1.016607 -1.224665  
C 2.663492 -0.257637 -1.177389  
C 3.812416 0.372802 -0.750186  
C 3.951103 0.770494 0.593662  
C 2.930232 0.523766 1.476589  
C 1.752899 -0.113442 1.060119  
H 2.545989 -0.572652 -2.195222  
H 4.607035 0.558070 -1.447086  
H 4.848706 1.258639 0.919319  
H 3.023164 0.817539 2.504642  
H 0.965659 -0.303377 1.761663

1 (CI-CCW, level 2)

N -0.485924 -1.108218 -0.760617  
N 0.581186 -1.488350 -0.173042  
C 1.670755 -0.580770 -0.131621  
C 2.800229 -1.025320 0.515871  
C 3.919725 -0.191134 0.636279  
C 3.897234 1.071683 0.097657  
C 2.749449 1.528593 -0.576730  
C 1.641397 0.713542 -0.694764  
H 4.753736 1.712051 0.183534  
H 2.737864 2.512908 -1.003045  
H 0.768197 1.048684 -1.215944  
C -1.619481 -0.490521 -0.274144  
C -1.760093 -0.145229 1.056747  
C -2.938641 0.476524 1.493347  
C -3.958353 0.751631 0.617605  
C -3.817959 0.399191 -0.738659  
C -2.667913 -0.216096 -1.184830  
H -4.856913 1.227678 0.958242  
H -4.612052 0.606772 -1.429810  
H -2.548918 -0.497761 -2.212216  
H -3.033183 0.735765 2.530470  
H -0.973157 -0.358583 1.751862  
H 2.806803 -2.016424 0.924653  
H 4.792688 -0.547669 1.147315

1 (cis, level 3)

N 0.617475 2.033329 -0.039966  
N -0.599669 2.035111 0.007645  
C 1.364353 0.805448 -0.103587  
C -1.349180 0.807695 0.094110  
C -2.296391 0.561174 -0.898191  
C -3.115142 -0.560445 -0.811003  
C -3.026390 -1.407099 0.279355  
C -2.113434 -1.134331 1.297957  
C -1.272794 -0.026986 1.211243  
H -2.381513 1.245805 -1.731037  
H -3.833380 -0.758926 -1.595436  
H -3.672616 -2.271770 0.349727  
H -2.054393 -1.782687 2.161656  
H -0.571618 0.188480 2.003756  
C 2.320147 0.589826 0.859805  
C 3.133675 -0.550658 0.799787  
C 3.014347 -1.432121 -0.247613  
C 2.075271 -1.184278 -1.260086  
C 1.251378 -0.074040 -1.193245  
H 2.433828 1.304690 1.663470  
H 3.865633 -0.722529 1.577660  
H 3.649721 -2.305897 -0.301536  
H 1.991649 -1.862937 -2.098139  
H 0.532995 0.121582 -1.975067

1 (trans, level 3)

N 0.371853 -0.478403 0.000132  
N -0.373107 0.485199 0.000142  
C -1.761991 0.187018 0.000130  
C 1.762583 -0.180676 0.000128  
C 2.606768 -1.273378 0.000048  
C 3.990571 -1.098099 -0.000106  
C 4.524703 0.186549 -0.000180  
C 3.668292 1.295293 -0.000076  
C 2.290411 1.119555 0.000082  
H 2.172128 -2.263167 0.000075  
H 4.642624 -1.960991 -0.000189  
H 5.597049 0.329889 -0.000322  
H 4.080540 2.295575 -0.000140  
H 1.621185 1.965074 0.000129  
C -2.606266 1.270353 0.000060  
C -3.998822 1.086423 -0.000091  
C -4.521489 -0.181682 -0.000163  
C -3.660816 -1.296440 -0.000078  
C -2.291325 -1.120897 0.000068  
H -2.178890 2.263214 0.000088  
H -4.652015 1.948595 -0.000165  
H -5.593366 -0.329769 -0.000294  
H -4.076093 -2.295335 -0.000144  
H -1.620090 -1.964764 0.000107

1 (CI-CW, level 3)

N 0.487727 -1.139003 -0.728448  
N -0.592574 -1.489537 -0.123918  
C 1.612825 -0.503688 -0.258398  
C -1.652877 -0.579141 -0.120392  
C -2.819221 -1.011714 0.547340  
C -3.907956 -0.185750 0.637667  
C -3.873522 1.091678 0.052851  
C -2.744936 1.516587 -0.614041  
C -1.625406 0.689369 -0.709850  
H -2.821926 -2.001072 0.982437  
H -4.798303 -0.517146 1.154732  
H -4.738156 1.738038 0.122131  
H -2.722424 2.496887 -1.070893  
H -0.748097 1.019019 -1.245285  
C 2.667261 -0.263089 -1.175301  
C 3.814314 0.368111 -0.747047  
C 3.950554 0.772389 0.597167  
C 2.926964 0.530039 1.476017  
C 1.747305 -0.108483 1.058948  
H 2.550771 -0.584830 -2.200261  
H 4.616906 0.550537 -1.449320  
H 4.854732 1.264972 0.927177  
H 3.017742 0.830806 2.511690  
H 0.950865 -0.295278 1.764387

1 (CI-CCW, level 3)

N -0.490146 -1.093351 -0.788895  
N 0.577745 -1.478168 -0.203559  
C 1.668053 -0.577316 -0.143596  
C 2.789411 -1.032662 0.508713  
C 3.912901 -0.202839 0.646650  
C 3.901034 1.063592 0.119063  
C 2.759851 1.531147 -0.561820  
C 1.648916 0.723711 -0.696006  
H 4.767162 1.704121 0.218579  
H 2.755494 2.526994 -0.983871  
H 0.775391 1.071587 -1.226086  
C -1.619842 -0.485053 -0.283346  
C -1.755190 -0.164681 1.052806  
C -2.935358 0.450322 1.503621  
C -3.956644 0.742151 0.637485  
C -3.818709 0.413841 -0.727222  
C -2.671286 -0.193774 -1.187543  
H -4.861307 1.215992 0.992817  
H -4.620245 0.635912 -1.419175  
H -2.552806 -0.458737 -2.228411  
H -3.027952 0.692700 2.554298  
H -0.959805 -0.392501 1.747324  
H 2.785079 -2.035385 0.912087  
H 4.786971 -0.570679 1.166770

|                                  |              |            |                                        |              |            |                           |              |            |            |
|----------------------------------|--------------|------------|----------------------------------------|--------------|------------|---------------------------|--------------|------------|------------|
| <b>1</b> (TS, level 1)           | C -2. 548310 | 2. 189204  | -0. 684580                             | N 0. 378713  | -1. 776559 | 0. 472565                 |              |            |            |
| N 0. 443739                      | -0. 977652   | 0. 009657  | C -1. 295042                           | 2. 469457    | 0. 164251  | C 1. 714035               | -1. 361681   | 0. 196048  |            |
| N -0. 697976                     | -1. 457738   | 0. 012702  | H -3. 413875                           | 2. 753993    | -0. 361663 | C 1. 796701               | 0. 024997    | 0. 108897  |            |
| C 1. 693489                      | -0. 452109   | 0. 004362  | H -2. 363861                           | 2. 442817    | -1. 725871 | C 0. 696159               | 1. 081324    | 0. 349011  |            |
| C -1. 818193                     | -0. 532265   | 0. 005311  | H -1. 569056                           | 2. 602437    | 1. 206886  | C -0. 708565              | 1. 086589    | -0. 364080 |            |
| C -3. 067467                     | -1. 115850   | 0. 005052  | H -0. 764827                           | 3. 354092    | -0. 161486 | C -1. 801370              | 0. 027884    | -0. 121788 |            |
| C -4. 214296                     | -0. 302784   | -0. 002518 | H 2. 175619                            | 2. 107303    | 2. 058766  | C -1. 702478              | -1. 360702   | -0. 214914 |            |
| C -4. 082313                     | 1. 062476    | -0. 009348 | H 1. 113170                            | 3. 131386    | 1. 128320  | C 2. 832648               | -2. 163545   | 0. 111216  |            |
| C -2. 803808                     | 1. 650905    | -0. 008763 | H 2. 308953                            | 2. 621623    | -0. 926611 | C 4. 073598               | -1. 564572   | -0. 080267 |            |
| C -1. 680026                     | 0. 867724    | -0. 001587 | H 3. 625595                            | 2. 517891    | 0. 214408  | C 4. 187062               | -0. 183584   | -0. 146406 |            |
| H -3. 142360                     | -2. 185216   | 0. 010492  | H 0. 340777                            | 0. 635031    | 1. 923899  | C 3. 048496               | 0. 604053    | -0. 035232 |            |
| H -5. 186620                     | -0. 755338   | -0. 002910 | <b>4</b> ( <i>trans</i> -CW, level 1)  | N 0. 347333  | -1. 736401 | -0. 509705                | C -2. 816659 | -2. 180960 | -0. 104639 |
| H -4. 952876                     | 1. 689518    | -0. 015152 | N -0. 348108                           | -1. 736885   | 0. 508897  | C -4. 183904              | -0. 196367   | 0. 171429  |            |
| H -2. 712705                     | 2. 719850    | -0. 014026 | C -1. 694205                           | -1. 331532   | 0. 276648  | C -3. 060344              | 0. 597888    | 0. 043001  |            |
| H -0. 703175                     | 1. 308895    | -0. 001177 | C -1. 776229                           | -0. 007793   | -0. 126130 | C 1. 451725               | 2. 390577    | -0. 055242 |            |
| C 2. 342432                      | -0. 193979   | -1. 210124 | C -0. 648359                           | 0. 995225    | -0. 440004 | H -0. 514381              | 1. 101297    | -1. 435035 |            |
| C 3. 618267                      | 0. 341034    | -1. 198576 | C 0. 648393                            | 0. 995734    | 0. 439089  | H 2. 739598               | -3. 228821   | 0. 187019  |            |
| C 4. 270067                      | 0. 628066    | -0. 006959 | C 1. 776229                            | -0. 009313   | 0. 126903  | H 4. 949448               | -2. 178496   | -0. 164613 |            |
| C 3. 618172                      | 0. 366285    | 1. 190388  | C 1. 692685                            | -1. 329396   | -0. 277212 | H 5. 152196               | 0. 271648    | -0. 265645 |            |
| C 2. 342206                      | -0. 168140   | 1. 213164  | C -2. 841401                           | -2. 065222   | 0. 588920  | C 2. 963647               | 2. 106965    | 0. 042602  |            |
| H 1. 848152                      | -0. 418174   | -2. 134032 | C -4. 072908                           | -1. 472238   | 0. 428549  | H -2. 715701              | -3. 245887   | -0. 176919 |            |
| H 4. 105860                      | 0. 532778    | -2. 135397 | C -4. 180977                           | -0. 140029   | -0. 003645 | H -4. 934834              | -2. 204430   | 0. 208901  |            |
| H 5. 258829                      | 1. 041616    | -0. 011298 | C -3. 041753                           | 0. 581758    | -0. 266042 | H -5. 152032              | 0. 249162    | 0. 304489  |            |
| H 4. 105661                      | 0. 577911    | 2. 122972  | C 2. 842591                            | -2. 065367   | -0. 590203 | C -2. 979195              | 2. 102411    | -0. 033115 |            |
| H 1. 847720                      | -0. 372299   | 2. 141601  | C 4. 071856                            | -1. 473762   | -0. 428313 | C -1. 466305              | 2. 391139    | 0. 053557  |            |
| <b>4</b> ( <i>cis</i> , level 1) | N -0. 627160 | -2. 067322 | 1. 048845                              | C 4. 180597  | -0. 139725 | 0. 006354                 | H -3. 532595 | 2. 596806  | 0. 756865  |
| N 0. 595856                      | -2. 175946   | 0. 993466  | C 3. 044066                            | 0. 581396    | 0. 268595  | H -3. 391536              | 2. 449237    | -0. 976653 |            |
| C 1. 525810                      | -1. 405983   | 0. 236125  | C -1. 429930                           | 2. 339764    | -0. 330670 | H -1. 209059              | 2. 624430    | 1. 081446  |            |
| C 1. 647126                      | -0. 047272   | 0. 316533  | H 0. 345566                            | 0. 855091    | 1. 474237  | H -1. 180387              | 3. 239377    | -0. 552784 |            |
| C 0. 718371                      | 0. 959547    | 0. 960476  | H -2. 752324                           | -3. 074315   | 0. 939962  | H 1. 157172               | 3. 234025    | 0. 553498  |            |
| C -0. 458368                     | 1. 182992    | -0. 005921 | H -4. 963187                           | -2. 029417   | 0. 648127  | H 1. 201390               | 2. 628048    | -1. 083826 |            |
| C -1. 532688                     | 0. 099389    | -0. 032076 | H -5. 151184                           | 0. 307969    | -0. 108314 | H 3. 522429               | 2. 603336    | -0. 742487 |            |
| C -1. 560881                     | -1. 229284   | 0. 332307  | C -2. 892669                           | 2. 018868    | -0. 703599 | H 3. 368887               | 2. 453380    | 0. 989567  |            |
| C 2. 501016                      | -2. 150593   | -0. 459215 | H 2. 752068                            | -3. 073506   | -0. 943407 | H 0. 499521               | 1. 088834    | 1. 420087  |            |
| C 3. 534836                      | -1. 517764   | -1. 094762 | H 4. 962525                            | -2. 030248   | -0. 648169 | <b>4</b> (CI-CW, level 1) | N 0. 466914  | -2. 217351 | 0. 190256  |
| C 3. 668784                      | -0. 115866   | -1. 017691 | H 5. 151436                            | 0. 306920    | 0. 111282  | N -0. 553380              | -1. 876659   | 1. 001603  |            |
| C 2. 734552                      | 0. 602986    | -0. 303578 | C 2. 892671                            | 2. 018346    | 0. 705643  | C 1. 611080               | -1. 429626   | -0. 029074 |            |
| C -2. 763699                     | -1. 961705   | 0. 149489  | C 1. 431381                            | 2. 339191    | 0. 326998  | C 2. 698276               | -2. 082385   | -0. 609954 |            |
| C -3. 881339                     | -1. 400587   | -0. 390676 | H 3. 599419                            | 2. 684860    | 0. 226300  | C 1. 705720               | -0. 075089   | 0. 271273  |            |
| C -3. 880415                     | -0. 028200   | -0. 715721 | H 3. 041362                            | 2. 106585    | 1. 779043  | C 3. 863598               | -1. 392247   | -0. 889021 |            |
| C -2. 733426                     | 0. 697657    | -0. 512818 | H 1. 402435                            | 2. 681113    | -0. 702961 | C 2. 877687               | 0. 611676    | -0. 032462 |            |
| C 1. 648073                      | 2. 192860    | 1. 114987  | H 1. 007066                            | 3. 117597    | 0. 946226  | C 3. 959452               | -0. 034450   | -0. 604195 |            |
| H -0. 039173                     | 1. 220819    | -1. 011409 | H -1. 006769                           | 3. 115619    | -0. 953889 | C -1. 687637              | -1. 224425   | 0. 400464  |            |
| H 2. 417563                      | -3. 219270   | -0. 462579 | H -1. 397800                           | 2. 685333    | 0. 697932  | C -2. 895075              | -1. 914846   | 0. 451798  |            |
| H 4. 264360                      | -2. 092984   | -1. 631243 | H -3. 597670                           | 2. 684947    | -0. 221063 | C -1. 655421              | 0. 069749    | -0. 093710 |            |
| H 4. 498930                      | 0. 372248    | -1. 492372 | H -3. 046444                           | 2. 106811    | -1. 776254 | C -4. 058831              | -1. 327342   | -0. 012049 |            |
| C 2. 663844                      | 2. 092787    | -0. 045817 | H -0. 344965                           | 0. 852203    | -1. 474685 | C -2. 844697              | 0. 669543    | -0. 508743 |            |
| H -2. 760958                     | -2. 980708   | 0. 479067  | <b>4</b> ( <i>trans</i> -CCW, level 1) | N -0. 357381 | -1. 734189 | -0. 510806                | C -4. 040905 | -0. 020891 | -0. 489538 |
| H -4. 770079                     | -1. 986051   | -0. 523195 | N 0. 357381                            | -1. 734189   | -0. 510806 | C 0. 638187               | 0. 860487    | 0. 822934  |            |
| H -4. 773463                     | 0. 444510    | -1. 078979 |                                        |              |            |                           |              |            |            |

C -0.496902 1.055736 -0.218568  
H -0.061014 0.940119 -1.209780  
C -1.249372 2.409863 -0.202017  
H 2.606608 -3.127182 -0.828253  
H 4.693848 -1.909079 -1.329756  
H 4.860136 0.504038 -0.831198  
H -2.905804 -2.902470 0.868119  
H -4.981037 -1.874035 0.024881  
H -4.949865 0.449447 -0.814079  
C 1.470423 2.128999 1.172313  
H 0.195634 0.469606 1.731624  
C 2.741936 2.078752 0.299452  
H 0.917409 3.047563 1.045930  
H 1.754313 2.068594 2.216982  
H 3.607915 2.472777 0.818416  
H 2.623545 2.662738 -0.609807  
C -2.594398 2.109395 -0.896158  
H -1.433060 2.716208 0.823219  
H -0.693925 3.197472 -0.694280  
H -3.387526 2.774278 -0.576622  
H -2.500639 2.210603 -1.974877

**4** (CI-CCW, level 1)

N -0.502685 -2.203296 0.196920  
N 0.577763 -2.012732 0.985247  
C 1.686410 -1.366214 0.341866  
C 1.728536 0.008955 0.291612  
C 0.684763 0.990125 0.789013  
C -0.527619 1.107456 -0.172900  
C -1.643220 0.045486 -0.083949  
C -1.627597 -1.346309 0.053193  
C 2.744330 -2.117617 -0.151109  
C 3.835196 -1.473641 -0.715341  
C 3.888140 -0.084070 -0.771189  
C 2.834352 0.649566 -0.256132  
C -2.828322 -2.059537 0.001966  
C -4.040510 -1.421965 -0.164541  
C -4.071815 -0.042786 -0.306961  
C -2.885777 0.664058 -0.274382  
C 1.542480 2.290573 0.892253  
H -0.144380 1.089408 -1.192510  
H 2.709881 -3.186929 -0.084748  
H 4.650641 -2.055307 -1.099734  
H 4.743835 0.406348 -1.195397  
C 2.664616 2.147817 -0.160330  
H -2.776157 -3.124582 0.100433  
H -4.947452 -1.993852 -0.188212  
H -5.003950 0.470755 -0.448678  
C -2.738807 2.150451 -0.473295  
C -1.319169 2.426458 0.033213  
H -3.490188 2.721103 0.059334  
H -2.832471 2.400841 -1.527230

H -1.350394 2.659809 1.093100  
H -0.856985 3.260796 -0.475987  
H 1.990909 2.316063 1.879550  
H 0.974074 3.199620 0.775565  
H 2.366068 2.566156 -1.118457  
H 3.573446 2.655472 0.139987  
H 0.311654 0.713662 1.769885

**4** (*cis*, level 2)

N -0.635533 -1.989853 1.205161  
N 0.569783 -2.113098 1.156069  
C 1.457931 -1.413655 0.286686  
C 1.638090 -0.041992 0.342969  
C 0.755026 1.004513 0.992666  
C -0.437825 1.220124 0.049539  
C -1.497927 0.122266 0.001891  
C -1.521733 -1.205744 0.375121  
C 2.357260 -2.191532 -0.458480  
C 3.374034 -1.595915 -1.167652  
C 3.566579 -0.207248 -1.114577  
C 2.700449 0.558625 -0.349179  
C -2.697196 -1.958976 0.122961  
C -3.792636 -1.417570 -0.484451  
C -3.803501 -0.046106 -0.800490  
C -2.680817 0.700983 -0.533231  
C 1.716580 2.220885 1.067544  
H -0.025399 1.269820 -0.959221  
H 2.244624 -3.258165 -0.453070  
H 4.043609 -2.203228 -1.745744  
H 4.380712 0.245249 -1.648598  
C 2.690228 2.056139 -0.123918  
H -2.704283 -2.978021 0.455193  
H -4.659636 -2.021360 -0.669849  
H -4.686467 0.411658 -1.205111  
C -2.516526 2.198897 -0.678205  
C -1.296902 2.490618 0.217799  
H -3.403615 2.742480 -0.377832  
H -2.300335 2.472338 -1.708425  
H -1.606292 2.601800 1.253017  
H -0.773264 3.389598 -0.078154  
H 2.274772 2.160388 1.995538  
H 1.202408 3.171389 1.061839  
H 2.327668 2.577323 -1.005793  
H 3.674402 2.451810 0.096699  
H 0.404660 0.721699 1.978942

**4** (*trans*-CW, level 2)

N -0.321475 -1.708198 0.526347  
N 0.323336 -1.723557 -0.506946  
C 1.671852 -1.330730 -0.274240  
C 1.770743 -0.004585 0.120944  
C 0.652473 1.008845 0.438052

C -0.650329 1.008483 -0.428458  
C -1.773730 0.003486 -0.106866  
C -1.674089 -1.330497 0.288825  
C 2.815643 -2.074294 -0.582527  
C 4.052642 -1.491997 -0.424724  
C 4.172884 -0.157786 -0.002279  
C 3.039799 0.575406 0.255832  
C -2.814133 -2.078147 0.575422  
C -4.066997 -1.488120 0.404507  
C -4.176388 -0.156126 -0.011714  
C -3.035465 0.578923 -0.255328  
C 1.441734 2.346906 0.314265  
H -0.354231 0.864335 -1.465693  
H 2.719889 -3.085108 -0.927577  
H 4.937974 -2.058765 -0.640240  
H 5.147121 0.282372 0.098691  
C 2.903720 2.017092 0.683396  
H -2.723742 -3.091541 0.914565  
H -4.953369 -2.058098 0.606064  
H -5.147491 0.288351 -0.125454  
C -2.898515 2.020824 -0.685678  
C -1.435660 2.349928 -0.318219  
H -3.604906 2.679037 -0.194178  
H -3.059399 2.115743 -1.756644  
H -1.400539 2.696772 0.709981  
H -1.017696 3.126721 -0.944040  
H 1.026887 3.130644 0.933389  
H 1.406786 2.684636 -0.716974  
H 3.612277 2.673877 0.193285  
H 3.062376 2.111954 1.754816  
H 0.357931 0.875691 1.476947

**4** (*trans*-CCW, level 2)

N 0.337794 -1.716128 0.511866  
N -0.344021 -1.748599 -0.492968  
C -1.684984 -1.361625 -0.208339  
C -1.789539 0.034233 -0.119918  
C -0.693779 1.094340 -0.357056  
C 0.704038 1.095910 0.367696  
C 1.796805 0.036675 0.126971  
C 1.684546 -1.362634 0.219650  
C -2.799610 -2.177966 -0.116030  
C -4.054365 -1.585600 0.088267  
C -4.176370 -0.199992 0.155798  
C -3.035362 0.599628 0.034474  
C 2.775171 -2.178896 0.116891  
C 4.038785 -1.597462 -0.102000  
C 4.176246 -0.221059 -0.174349  
C 3.039016 0.593425 -0.042359  
C -1.455981 2.400768 0.044646  
H 0.498447 1.106226 1.436876  
H -2.698562 -3.242851 -0.192206

H -4. 924696 -2. 206538 0. 179777  
H -5. 142593 0. 250455 0. 284772  
C -2. 966973 2. 104152 -0. 038702  
H 2. 668579 -3. 242816 0. 196973  
H 4. 899598 -2. 230561 -0. 199107  
H 5. 145031 0. 220123 -0. 315068  
C 2. 979382 2. 097650 0. 026434  
C 1. 467814 2. 401583 -0. 036385  
H 3. 524855 2. 579739 -0. 777072  
H 3. 415364 2. 445739 0. 959225  
H 1. 200945 2. 655701 -1. 056579  
H 1. 196199 3. 241334 0. 588249  
H -1. 172637 3. 242776 -0. 571644  
H -1. 199890 2. 647282 1. 069610  
H -3. 521120 2. 591880 0. 755289  
H -3. 386661 2. 451519 -0. 979057  
H -0. 488316 1. 104291 -1. 426457

**4** (CI-CW, level 2)

N 0. 432500 -2. 143103 0. 086345  
N -0. 572258 -1. 969128 0. 892825  
C 1. 604800 -1. 415452 -0. 068027  
C 2. 702625 -2. 074412 -0. 626538  
C 1. 718960 -0. 069768 0. 269452  
C 3. 888971 -1. 396676 -0. 844323  
C 2. 910292 0. 602210 0. 025400  
C 4. 002596 -0. 048886 -0. 522719  
C -1. 692950 -1. 247476 0. 381674  
C -2. 931854 -1. 898994 0. 507832  
C -1. 652900 0. 054432 -0. 121635  
C -4. 103229 -1. 281201 0. 090408  
C -2. 854585 0. 674247 -0. 499710  
C -4. 061193 0. 022904 -0. 417828  
C 0. 636942 0. 858026 0. 791290  
C -0. 487800 1. 033265 -0. 267972  
H -0. 044569 0. 897748 -1. 252603  
C -1. 228606 2. 394823 -0. 269819  
H 2. 606676 -3. 112098 -0. 875909  
H 4. 724778 -1. 919355 -1. 267935  
H 4. 920069 0. 477528 -0. 705924  
H -2. 948391 -2. 883078 0. 933027  
H -5. 040586 -1. 795171 0. 179113  
H -4. 968906 0. 514607 -0. 713719  
C 1. 452575 2. 134402 1. 161030  
H 0. 179606 0. 466820 1. 693685  
C 2. 778937 2. 065915 0. 372376  
H 0. 913721 3. 051262 0. 976353  
H 1. 667643 2. 101257 2. 223058  
H 3. 615895 2. 434631 0. 954086  
H 2. 734648 2. 664757 -0. 533617  
C -2. 589961 2. 099435 -0. 928417  
H -1. 389498 2. 725655 0. 751601

H -0. 672510 3. 165328 -0. 787820  
H -3. 365674 2. 785617 -0. 611402  
H -2. 516310 2. 169347 -2. 011033

**4** (CI-CCW, level 2)

N -0. 464271 -2. 103533 0. 275608  
N 0. 580700 -1. 972188 1. 004074  
C 1. 696069 -1. 364705 0. 349996  
C 1. 724288 0. 007731 0. 272254  
C 0. 688083 0. 996005 0. 781944  
C -0. 552304 1. 114802 -0. 142684  
C -1. 654225 0. 042237 -0. 053637  
C -1. 610028 -1. 349241 0. 083281  
C 2. 781565 -2. 122059 -0. 126573  
C 3. 850528 -1. 479448 -0. 699156  
C 3. 886212 -0. 075048 -0. 790019  
C 2. 835579 0. 654117 -0. 298024  
C -2. 813731 -2. 095947 -0. 031813  
C -4. 011246 -1. 477870 -0. 240259  
C -4. 071402 -0. 077718 -0. 355923  
C -2. 915778 0. 647655 -0. 268634  
C 1. 548417 2. 297575 0. 856025  
H -0. 195753 1. 118772 -1. 172672  
H 2. 759330 -3. 190243 -0. 036739  
H 4. 677563 -2. 052916 -1. 071509  
H 4. 739916 0. 409481 -1. 225052  
C 2. 644847 2. 150983 -0. 223223  
H -2. 749376 -3. 160689 0. 069866  
H -4. 909758 -2. 060203 -0. 308966  
H -5. 013371 0. 410549 -0. 520021  
C -2. 772931 2. 140105 -0. 430795  
C -1. 359437 2. 418567 0. 098360  
H -3. 535343 2. 694319 0. 103423  
H -2. 852612 2. 413702 -1. 480061  
H -1. 399925 2. 619564 1. 164915  
H -0. 907033 3. 274461 -0. 382968  
H 2. 021442 2. 330854 1. 831745  
H 0. 975753 3. 205119 0. 747510  
H 2. 311269 2. 545851 -1. 179725  
H 3. 553239 2. 678724 0. 041161  
H 0. 342613 0. 726256 1. 774600

**4** (TS-CW, level 1)

N -0. 364087 -1. 799646 0. 289123  
N 0. 755135 -2. 347362 0. 393903  
C 1. 839402 -1. 421395 0. 120757  
C 1. 718894 -0. 034590 0. 208489  
C 0. 566043 0. 851688 0. 716272  
C -0. 632027 1. 048444 -0. 275361  
C -1. 755272 0. 030705 -0. 147281  
C -1. 638909 -1. 324126 0. 127949  
C 3. 037350 -1. 998977 -0. 272307

C 4. 118769 -1. 207560 -0. 625025  
C 4. 010823 0. 174860 -0. 562042  
C 2. 822933 0. 745369 -0. 134234  
C -2. 804425 -2. 114629 0. 225577  
C -4. 034495 -1. 534827 0. 035353  
C -4. 148006 -0. 159858 -0. 244592  
C -3. 015077 0. 611922 -0. 328801  
C 1. 335685 2. 170391 1. 040445  
H -0. 242842 1. 009174 -1. 290471  
H 3. 097368 -3. 069114 -0. 305216  
H 5. 037666 -1. 663772 -0. 939056  
H 4. 847805 0. 795639 -0. 821766  
C 2. 532835 2. 211541 0. 075392  
H -2. 706294 -3. 158653 0. 447097  
H -4. 923007 -2. 131968 0. 106580  
H -5. 120644 0. 273932 -0. 383334  
C -2. 858577 2. 089091 -0. 604175  
C -1. 425811 2. 378210 -0. 099360  
H -3. 602237 2. 697260 -0. 103407  
H -2. 941702 2. 289235 -1. 669510  
H -1. 471713 2. 632099 0. 954735  
H -0. 966481 3. 207785 -0. 620271  
H 1. 709337 2. 100891 2. 056747  
H 0. 722675 3. 056011 0. 985559  
H 2. 270390 2. 695037 -0. 862899  
H 3. 376955 2. 751288 0. 487946  
H 0. 154590 0. 446662 1. 633753

**4** (TS'-CW, level 1)

N -0. 565147 -2. 224857 0. 461504  
N 0. 508033 -1. 800929 1. 201684  
C 1. 622001 -1. 337211 0. 432224  
C 1. 742096 0. 026766 0. 309799  
C 0. 768678 1. 063190 0. 823201  
C -0. 500683 1. 151764 -0. 059356  
C -1. 599437 0. 056122 0. 000111  
C -1. 596775 -1. 347186 0. 133774  
C 2. 582887 -2. 176861 -0. 110727  
C 3. 664444 -1. 618566 -0. 779901  
C 3. 795005 -0. 238185 -0. 905705  
C 2. 826150 0. 582347 -0. 352178  
C -2. 813119 -2. 062298 -0. 096667  
C -3. 979619 -1. 428311 -0. 378030  
C -4. 000374 -0. 021775 -0. 471379  
C -2. 844989 0. 680090 -0. 298380  
C 1. 663494 2. 342995 0. 773453  
H -0. 166131 1. 172209 -1. 097425  
H 2. 491034 -3. 239519 -0. 003829  
H 4. 412703 -2. 263594 -1. 198531  
H 4. 642222 0. 177170 -1. 417878  
C 2. 724617 2. 090487 -0. 326073  
H -2. 762511 -3. 128533 -0. 010808

H -4. 881054 -1. 990765 -0. 524329  
H -4. 919432 0. 489685 -0. 687800  
C -2. 695358 2. 175213 -0. 419509  
C -1. 319746 2. 440475 0. 198532  
H -3. 491855 2. 714285 0. 078945  
H -2. 709127 2. 474163 -1. 464932  
H -1. 413128 2. 596376 1. 269440  
H -0. 848434 3. 315332 -0. 225299  
H 2. 166224 2. 434326 1. 730015  
H 1. 112319 3. 256513 0. 614410  
H 2. 397187 2. 472409 -1. 289730  
H 3. 668124 2. 571734 -0. 097332  
H 0. 466027 0. 854365 1. 843626

**4** (TS-CCW, level 1)

N -0. 400711 -1. 887022 -0. 023967  
N 0. 681017 -2. 181983 -0. 570066  
C -1. 645376 -1. 353752 0. 146058

C -2. 741204 -2. 095069 0. 591749  
C -1. 804996 -0. 014935 -0. 185982  
C -3. 985218 -1. 490399 0. 666321  
C -3. 071508 0. 550282 -0. 180802  
C -4. 169142 -0. 173264 0. 254113  
C 1. 803106 -1. 317473 -0. 279740  
C 3. 052093 -1. 941886 -0. 464066  
C 1. 727074 0. 019034 0. 088302  
C 4. 216065 -1. 261000 -0. 239508  
C 2. 951258 0. 696083 0. 322697  
C 4. 164014 0. 081391 0. 169215  
C -0. 715460 0. 970670 -0. 570853  
C 0. 546569 0. 982357 0. 350831  
H 0. 200939 0. 811177 1. 368736  
C 1. 264449 2. 364727 0. 297805  
H -2. 608550 -3. 124986 0. 855125  
H -4. 823742 -2. 059977 1. 018508  
H -5. 145679 0. 271280 0. 282512

H 3. 052534 -2. 965221 -0. 783349  
H 5. 163583 -1. 745133 -0. 375617  
H 5. 073398 0. 622481 0. 352656  
C -1. 505231 2. 320145 -0. 501264  
H -0. 387174 0. 797351 -1. 594710  
C -2. 999042 1. 973496 -0. 675324  
H -1. 372965 2. 756596 0. 481221  
H -1. 157828 3. 039670 -1. 230166  
H -3. 296342 2. 023840 -1. 719589  
H -3. 641907 2. 650542 -0. 125479  
C 2. 704255 2. 116022 0. 758675  
H 1. 274154 2. 718016 -0. 728613  
H 0. 765107 3. 110376 0. 899016  
H 3. 407738 2. 818698 0. 328575  
H 2. 784362 2. 199749 1. 840045
